# Supplementary material for: Target alcohol/phenol release by cyclative cleavage using glycine as a safety catch linkerIICT Communication No. 011207.Electronic supplementary information (ESI) available: experimental data. See http://www.rsc.org/suppdata/cc/b2/b203270h/
Source: Royal Society of Chemistry journal article supplement (doi:10.1039/b203270h), 2002-06-20
Supplement: b203270h.doc [file b203270h.doc]

# Supporting data

# NMR spectra were recorded on a 200 and 400 MHz spectrometer. 1H NMR and 13C NMR samples were internally referenced to TMS (0.00 ppm). Column chromatography was performed with 60-120 mesh silica gel.

**Preparation of 2:**

To the solution of the piperonyl alcohol (304 mg, 2 mmol) in dichloromethane (8 mL) at 0 oC, triethylamine (0.56 mL, 4 mmol) and chloroacetyl chloride (226 mg, 2 mmol) were added and maintained at the same temperature for 25 min. The reaction mixture was diluted with dichloromethane and washed successively with 10% aq. citric acid solution, water and brine. Drying over sodium sulfate and concentration afforded the chloroacetyl ester in nearly quantitative yield which was taken ahead to the next step without further purification. 1HNMR (CDCl3, 200 M Hz),  6.90-6.78 (m, 3H), 6.0 (s, 2H), 5.12 (s, 2H), 4.04 (s, 2H).

To the above compound in acetone (4 mL), NaI (1.5 g, 10 mmol) was added and let stir at r.t. for 4 h. The solvent was evaporated, the residue taken into ethyl acetate, washed with water and brine. Evaporation of the solvent under reduced pressure afforded the iodoacetyl ester in 96% yield. 1HNMR (CDCl3, 200 M Hz),  6.89-6.78 (m, 3H), 6.0 (s, 2H), 5.07 (s, 2H), 3.71 (s, 2H).

**Immobilization of iodoacetyl ester 2, by alkylation:**

**Preparation of 3a**:

To the suspension of the aminomethyl polystyrene resin **1**, (500 mg, 0.6 mmol) in DMF (4 mL) was added the solution of iodoacetyl ester 2(230 mg, 0.72 mmol) in DMF (1mL) followed by Hunig’s base (1.0 mL, 6 mmol). The reaction mixture was shaken at

25oC for 16h, the resin filtered and washed sequentially with DMF (2×10 mL), dioxane/water (9:1, 2×10 mL), dioxane (2×10 mL), MeOH (2×10 mL), MeOH/DCM (1:1, 2×10 mL), DCM (3×10 mL) and finally with ether (2×10 mL). The resin **3a** was dried under vacuum and weighed 612 mg.

## Immobilisation of alcohols/phenols directly to the solid support

**Preparation of 3b:**

To the suspension of Merrifield resin (500 mg, 1 mmol) in dry DMF (4 mL) was added NaI (150 mg, 1 mmol), *t*-butyl glycine.HCl (502 mg, 3 mmol) followed by Hunig’s base (1.0 mL, 6 mmol). The reaction mixture was heated at 65 oC for 36 h and cooled to r.t. The resin was filtered, washed as detailed earlier and dried under vacuum to yield 580mg of **3b**. The loading of glycine ester was found to be 80% by the Fmoc quantitation assay. [[1]](#footnote-2)†

**Preparation of 6:**

The resin **3b** (500 mg, 0.69 mmol) was suspended in TFA/DCM (1:1, 5 mL) at 0 oC and allowed to attain r.t. gradually and let stir at the same temperature for a further 3 h period. The resin was washed with Et3N/DCM (0.5: 9.5, 2×25 mL), DCM (2×25 mL) and dried under vacuum to yield **6** (465 mg).

**General procedure for the DCC coupling:**

**Preparation of 3c:**

To the suspension of the resin **6** (500mg, 0.67 mmol) in DCM (5 mL), were added HOBt (89 mg, 0.67mmol) and *p*-iodo benzyl alcohol (467 mg, 2.0 mmol). The mixture was cooled to 0 oC, DCC (139 mg, 0.67mmol) was added and allowed to attain r.t. Stirring was continued for another 8 h at r.t. The resin was then washed sequentially with MeOH (5×15 mL), MeOH/DCM (1:1, 3×20 mL), DCM (2×15 mL) and dried under vacuum to yield 601mg of the resin **3c**.

**Preparation of 3d:**

The above mentioned procedure was used for the immobilization of *m*-hydroxy methyl cinnamate onto 500 mg of the resin **6** to yield 580 mg of the resin **3d**.

**Preparation of 3e:**

Following the general procedure hydroquinone was tagged onto the resin **6** (500 mg, 0.67 mmol) to yield 543mg of **3e**.

**General procedure for activation and cleavage from the solid-support:**

To the suspension of the resin **3a** (500mg, 0.49 mmol) in DMF/Toluene (1:1, 10 mL) was added benzyl isocyanate (0.61 mL, 2.5 mmol). The mixture was shaken at r.t. for 8 h. The resin was then washed as described earlier and dried. The vacuum dried resin was suspended in dry diisopropyl amine (1 mL) and shaken for 1 h at r.t. The resin was filtered and washed with CH2Cl2 (2x10 mL). The combined filtrates were evaporated to afford crude piperonyl alcohol. Purification by column chromatography using 25% EtOAc/Pet. ether afforded the alcohol (61mg) in 80% yield.

**Preparation of 8:**

To the suspension of the resin **3c** (500 mg, 0.39 mmol) in dioxane (5 mL), phenyl boronic acid (475 mg, 3.9 mmol), K2CO3 (1.15 g, 8.3 mmol) dissolved in water (2.5 mL) was added and the resulting suspension was degassed for 30 min. Pd(OAc)2 (2mg, 0.01 mmol) was added and the reaction mixture was maintained at 100 oC for 24 h. The reaction mixture was allowed to attain r.t., the resin filtered, washed sequentially with dioxane (6x5 mL), water (6x5 mL), water/EtOH (1:1, 3x5 mL), EtOH (3x5 mL) and ether (3x5 mL). The resin was dried under vacuum and subjected to the same reaction conditions once again. Filtration and drying afforded 481mg of resin **7**. The resin was subjected to the same reaction conditions once again.Following the general procedure for cleavage, the crude Suzuki coupling product **8** was obtained. Purification by column chromatography using 15% EtOAc/pet. ether afforded pure **8** (71 mg) in 70% yield. 1H NMR (200 MHz, CDCl3),  7.59-7.52 (m, 4H), 7.43-7.20 (m, 5H), 4.71 (s, 2H), 1.66 (bs, 1H). 13C NMR (50 MHz, CDCl3),  64.6, 126.9, 127.0, 127.3, 127.7, 128.6, 139.7, 140.3, 140.6. MS (EI): *m*/*z* 184 (M+).

**Preparation of 10:**

The mixture of the resin **3c** (500 mg, 0.39 mmol), Et3N (5.15 mL, 38mmol), CuI (14mg, 0.08 mmol) and phenyl acetylene (118 mg, 1.16 mmol) in dioxane (10 mL) was degassed for 30 min. and then Pd(PPh3)2Cl2 (27 mg, 0.04 mmol) was added in one portion and shaken at 25 oC for 24 h. The resin was filtered, washed and dried. The resin was subjected to the same reaction conditions once again to afford 490 mg of **9**. Following the general cleavage protocol the crude Sonogoshira product **10**. Purification by column chromatography using 15% EtOAc/pet. ether afforded pure **10** (58 mg) in 72% yield. 1H NMR (200 MHz, CDCl3),  7.57-7.49 (m, 4H), 7.38-7.30 (m, 5H), 4.64 (s, 2H), 1.85 (bs, 1H). 13C NMR (50 MHz, CDCl3), 64.7, 89.1, 89.4, 122.4, 123.1, 126.8, 128.2, 128.3, 131.5, 131.7, 140.9. MS (EI): *m*/*z* 208 (M+).

**Preparation of 13&14:**

To the suspension of the resin **3d** (500 mg, 0.43 mmol) in benzene (10 mL) were added nitropropane (115 mg, 1.29 mmol), *p*-methoxyphenyl isocyanate (577 mg, 2.58 mmol) and Et3N (70 L, 0.5 mmol). The resulting mixture was shaken at r.t. for 16 h. The resin was washed sequentially with MeOH (5×10 mL), MeOH/DCM (1:1, 3×5 mL), DCM (2×5 mL) and finally with ether (2×5 mL). The weight of the resin after drying was 524mg. Cleavage from solid-support afforded the crude product mixture. Purification by column chromatography using 12% EtOAc/pet. ether as the eluent afforded **13** (50 mg) and **14** (13 mg) in a 4 : 1 ratio in 70% combined yield. **13**: 1H NMR (200 MHz, CDCl3),  7.21 (t, *J* = 5.71 Hz, 1H), 6.9 (bs, 2H), 6.8 (m, 2H), 5.81 (d, *J* = 8.57 Hz, 1H), 4.01 (d, *J* = 8.57 Hz, 1H), 3.82 (s, 3H), 2.52 (m, 1H), 2.35 (m, 1H), 1.2 (t, *J* = 9.1 Hz, 3H). 13C NMR (50 MHz, CDCl3),  10.5, 20.7, 53.0, 63.0, 84.6, 112.4, 115.7, 117.3, 130.1, 140.9, 156.7, 156.8, 168.8. MS (EI), *m/z* 249 (M+). **14**: 1H NMR (200 MHz, CDCl3),  7.1 (d, *J* = 7.12 Hz, 1H), 6.91-6.66 (m, 4H), 4.85 (d, *J* = 5 Hz, 1H), 4.45 (d, *J* = 5 Hz, 1H), 3.79 (s, 3H), 2.39-2.04 (m, 2H), 1.08 (t, *J* = 6.6 Hz, 3H). MS (EI) *m/z* 249 (M+).

**Preparation of 16:**

To the suspension of the resin **3e** (500 mg, 0.43 mmol ) in THF (5 mL) were added TPP (282 mg, 1.08 mmol), *p*-iodo benzyl alcohol (251mg, 1.08 mmol) and cooled to 0 oC. DEAD (187 mg, 1.08 mmol) was added, the temperature allowed to rise to r.t and stirred for further 16 h. The resin was filtered and washed successively with dioxane (3x5 mL), MeOH (3x5 mL), MeOH/DCM (1:1, 3x5 mL) and then with DCM (2x5 mL). The resin was dried to afford **15** (565 mg). Cleavage from the solid-support afforded the crude product **16**.Purification by column chromatography using 15% EtOAc/pet. ether as the eluent afforded pure **16** ( 51mg) in 60% yield. 1H NMR (200 MHz, CDCl3),  7.68 (d, *J* = 7.59 Hz, 2H), 7.14 (d, *J* = 7.59 Hz, 2H), 6.8-6.63 (m, 5H), 4.92 (s, 2H). 13C NMR (75 MHz, CDCl3),  151.0, 150.9, 136.8, 136.7, 128.7, 115.4, 115.3, 69.4. MS (EI): *m*/*z* 326 (M+).

1. † Refer: Bunin, B. A. *The combinatorial Index*, Academic press, 1998, pp. 219-220. [↑](#footnote-ref-2)
